# Supplementary material
Source: PubMed Central journal article supplement (PMC9530171)
Supplement: 41467_2022_33030_MOESM1_ESM.pdf [file 41467_2022_33030_MOESM1_ESM.pdf]

**Title: IgG-like bispecific antibodies with potent and synergistic neutralization against circulating SARS-CoV-2 variants of concern**

**Author List:** Matthew R. Chang<sup>1</sup>, Luke Tomasovic<sup>1</sup>, Natalia A. Kuzmina<sup>2,3,4</sup>, Adam J. Ronk<sup>2,3,4</sup>, Patrick O. Byrne<sup>5</sup>, Rebecca Johnson<sup>6</sup>, Nadia Storm<sup>6</sup>, Eduardo Olmedillas<sup>7</sup>, Yixuan J. Hou<sup>8</sup>, Alexandra Schaefer<sup>8</sup>, Sarah R. Leist<sup>8</sup>, Longping V. Tse<sup>8</sup>, Hanzhong Ke<sup>1,9</sup>, Christian Coherd<sup>1</sup>, Katrina Nguyen<sup>1</sup>, Maliwan Kamkaew<sup>1</sup>, Anna Honko<sup>6</sup>, Quan Zhu<sup>1,9</sup>, Galit Alter<sup>10</sup>, Erica Ollmann Saphire<sup>7</sup>, Jason McLellan<sup>5</sup>, Anthony Griffiths<sup>6</sup>, Ralph S. Baric<sup>8</sup>, Alexander Bukreyev<sup>2,3,4</sup>, and Wayne A. Marasco<sup>1,9\*</sup>

**Affiliations:**

<sup>1</sup>Department of Cancer Immunology & Virology, Dana-Farber Cancer Institute, Boston, MA, 02115, USA.

<sup>2</sup>Department of Pathology, University of Texas Medical Branch, Galveston, TX 77555, USA.

<sup>3</sup>Galveston National Laboratory, Galveston, TX 77555, USA.

<sup>4</sup>Department of Microbiology and Immunology, University of Texas Medical Branch, Galveston, TX 77555, USA.

<sup>5</sup>Department of Molecular Biosciences, University of Texas, Austin, TX 78712, USA.

<sup>6</sup>Department of Microbiology and National Emerging Infectious Diseases Laboratories, Boston University, School of Medicine, Boston, MA, 02118, USA.

<sup>7</sup>La Jolla Institute for Immunology, La Jolla, CA 92037, USA.

<sup>8</sup>Department of Epidemiology, University of North Carolina at Chapel Hill, Chapel Hill, NC, 27599, USA.

<sup>9</sup>Department of Medicine, Harvard Medical School, Boston, MA, 02115, USA.

<sup>10</sup>Ragon Institute of MGH, MIT and Harvard, Cambridge, MA 02139, USA.

**Corresponding Author:**

Wayne A. Marasco

450 Brookline Ave, Smith 534A

Boston, MA 02115

Phone: 617-632-2153

Email: Wayne\_Marasco@dfci.harvard.edu

**Supplementary Material**

Supplementary Figures 1-10

Supplementary Tables 1-3

Supplementary References

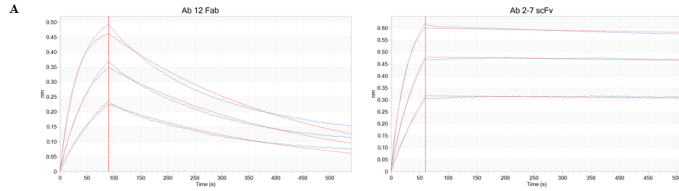

|             | $K_D$ (M) | $k_{on}$ ( $M^{-1} s^{-1}$ ) | $k_{off}$ ( $s^{-1}$ ) | $R^2$  |
|-------------|-----------|------------------------------|------------------------|--------|
| Ab 12 Fab   | 8.52E-09  | 3.39E+05                     | 2.89E-03               | 0.9887 |
| Ab 2-7 scFv | 1.07E-10  | 4.52E+05                     | 4.81E-05               | 0.9976 |

| Ab     | Heavy Chain       |                   |                   | Light Chain       |                   |
|--------|-------------------|-------------------|-------------------|-------------------|-------------------|
|        | V-GENE and allele | J-GENE and allele | D-GENE and allele | V-GENE and allele | J-GENE and allele |
| Ab 12  | HV4-59*11 F       | HJ1*01 F          | HD2-2*02 F        | LV1-44*01 F       | LJ1*01 F          |
| Ab 2-7 | HV2-5*01 F        | HJ3*02 F          | HD3-22*01 F       | LV6-57*01 F       | LJ3*02 F          |

| Ab                                       | FR1-IMGT                      |               | CDR1-IMGT         |            | FR2-IMGT                                 |           | CDR2-IMGT   |             | FR3-IMGT |          | CDR3-IMGT |          | FW4-IMGT |          |
|------------------------------------------|-------------------------------|---------------|-------------------|------------|------------------------------------------|-----------|-------------|-------------|----------|----------|-----------|----------|----------|----------|
|                                          | Sequence                      | Germline      | Sequence          | Germline   | Sequence                                 | Germline  | Sequence    | Germline    | Sequence | Germline | Sequence  | Germline | Sequence | Germline |
| M540647 Homsap IGHV4-59*11 F<br>Ab 12-HC | QVQLQESGP...GLVRFSEETLSLTCTVS | GGSI...SSHY   | WSWIRPPGKLEWIGY   | IYIS...GST | NYNPSLR.SRVTISVDTSEKQVFLKLSVTAADTAVYIC   | AR        | ARGPCILSY   | WSRGTLLTVSS |          |          |           |          |          |          |
| 273654 Homsap IGLV1-44*01 F<br>Ab 12-LC  | QSVLTQPPS.ASGTPGQRVTISCSGS    | SSNI...GSNT   | VNWYQQLPGTAPRLLIY | SN.....N   | QRPSGVP.DRFSGSK..SGTSASLAIISGLQSEDEADYIC | AAWDDSLNG | FGSGTKVTVL  |             |          |          |           |          |          |          |
| X62111 Homsap IGHV2-5*01 F<br>Ab 2-7-HC  | QITLRESGP.TLVKPTQTLLTCTFS     | GFSLS...TSGVG | VGWIRPPGKALEWIAL  | IYWN...DDK | RYSPSLK.SRLTITKDTSEKQVFLKLSVTAADTAVYIC   | AHR       | WSRGTLLTVSS |             |          |          |           |          |          |          |
| 273673 Homsap IGLV6-57*01 F<br>Ab 2-7-LC | NFMLTQPHS.VSESPGRTVTISCTRS    | SGSI...ASNY   | VQWYQQRPGSSPTTVIY | ED.....N   | QRPSGVP.DRFSGSIDSSNSASLITISGLTEDEADYIC   | QSYDSSN   | FGGGTKLTVL  |             |          |          |           |          |          |          |

**Supplementary Figure 1: Characterization and analysis of anti-SARS-CoV-2 antibodies** **A)** Biolayer interferometry traces for Ab 12 Fab (left) and 2-7 scFv (right). Abs were tested at 100, 50, and 25 nM against biotinylated RBD. The red trace shows the classical 1:1 binding model for the collected data (blue trace). **B)** Kinetic constants and  $R^2$  values derived from the traces in **(A)** using a global fit of the indicated concentrations. **C)** Germline and allele assignments for Ab 12 and Ab 2-7. Sequences for the V region of **(D)** Ab 12 and **(E)** Ab 2-7 were aligned with their germline sequences with differences highlighted in red. Ab 12 HC is heavily mutated from the original IGHV4-59 sequences, whereas the LC shows minimal mutations outside of the FW1 region. Ab 2-7 has very few mutations compared to the germline sequences. Germline assignments and alignments were performed by IMGT V-QUEST<sup>1,2</sup>.

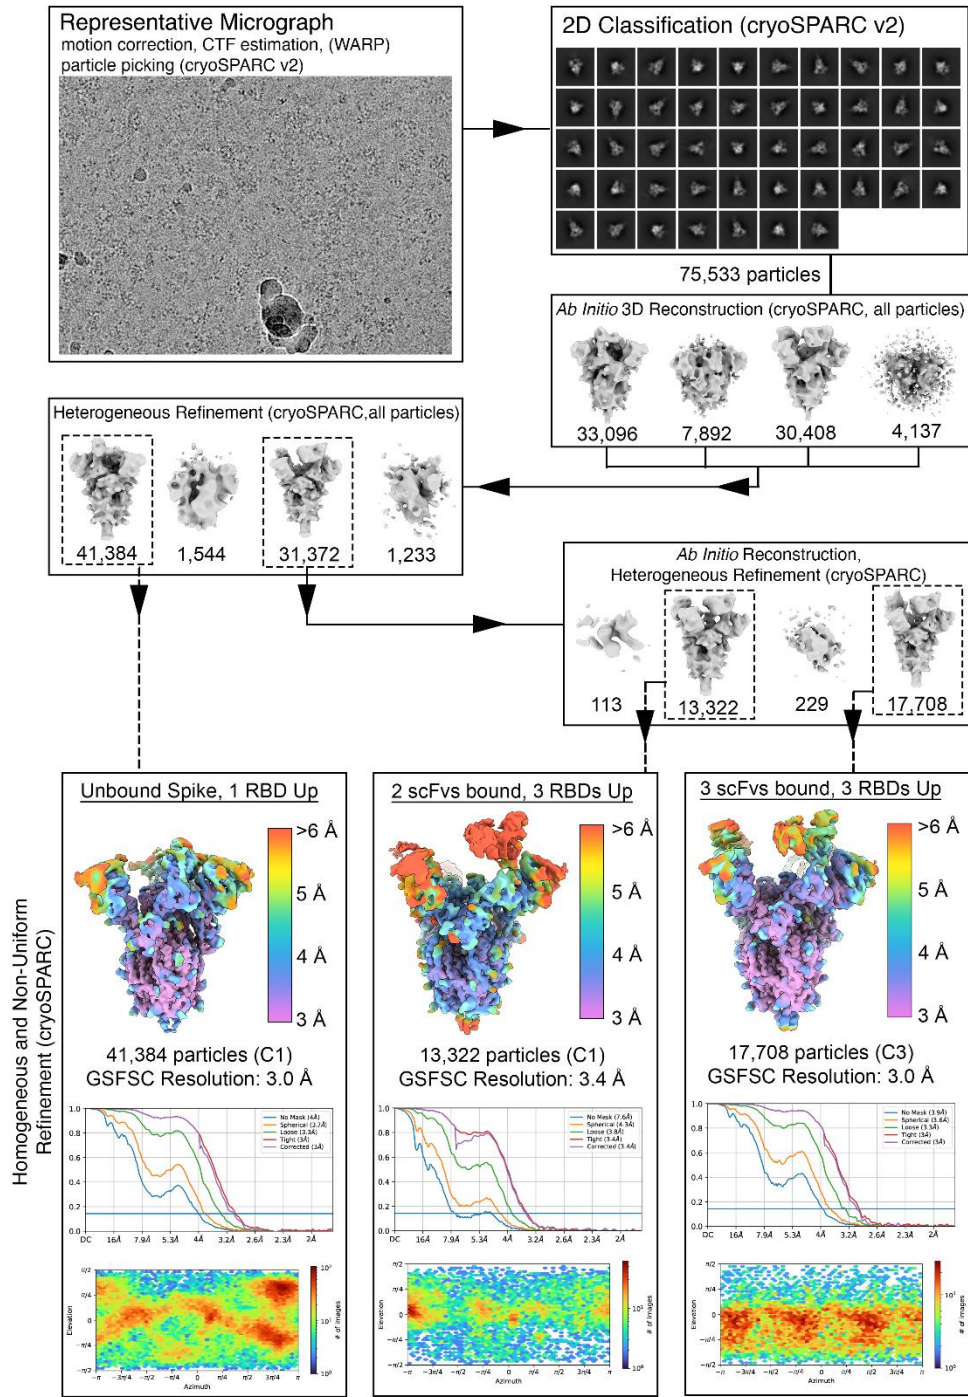

**Supplementary Figure 2: Cryo-EM Processing Pipeline for SARS-CoV-2 S-D614G complexed with Ab 2-7 scFv**

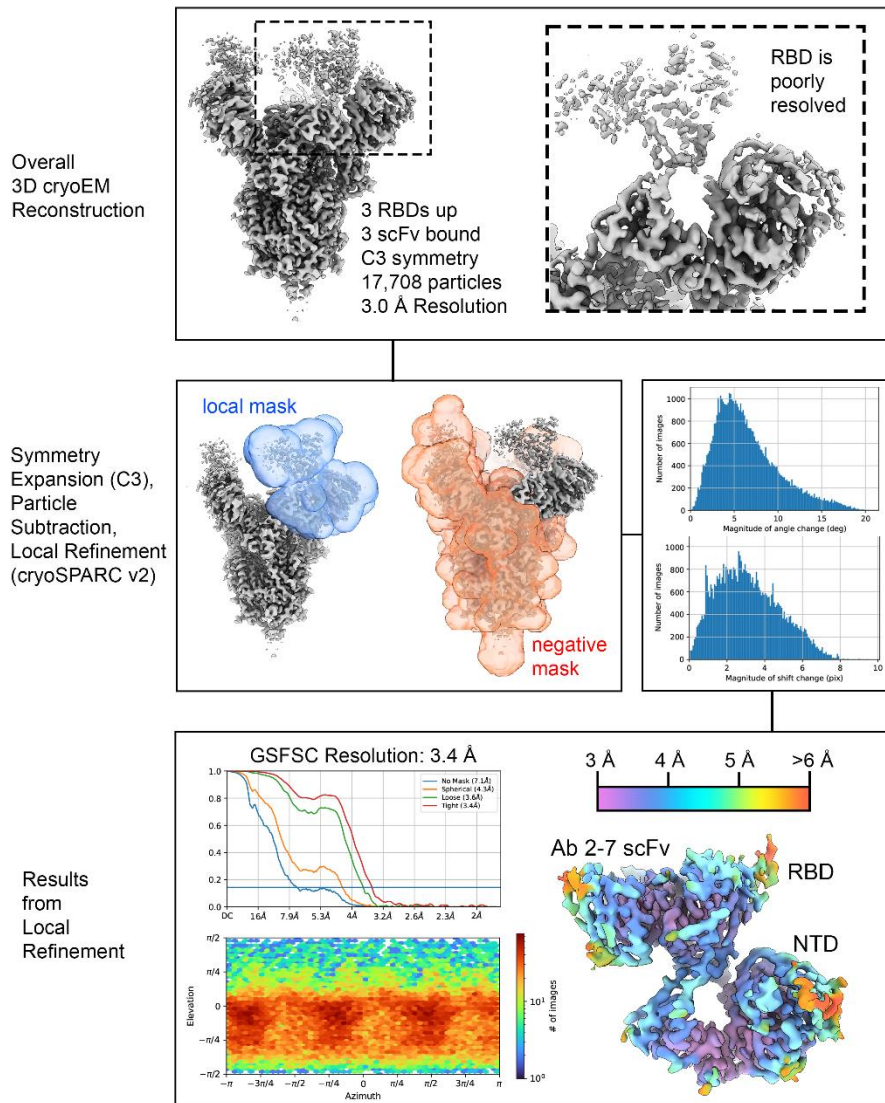

**Supplementary Figure 3: Local Refinement of Ab 2-7 scFv bound to the spike RBD**

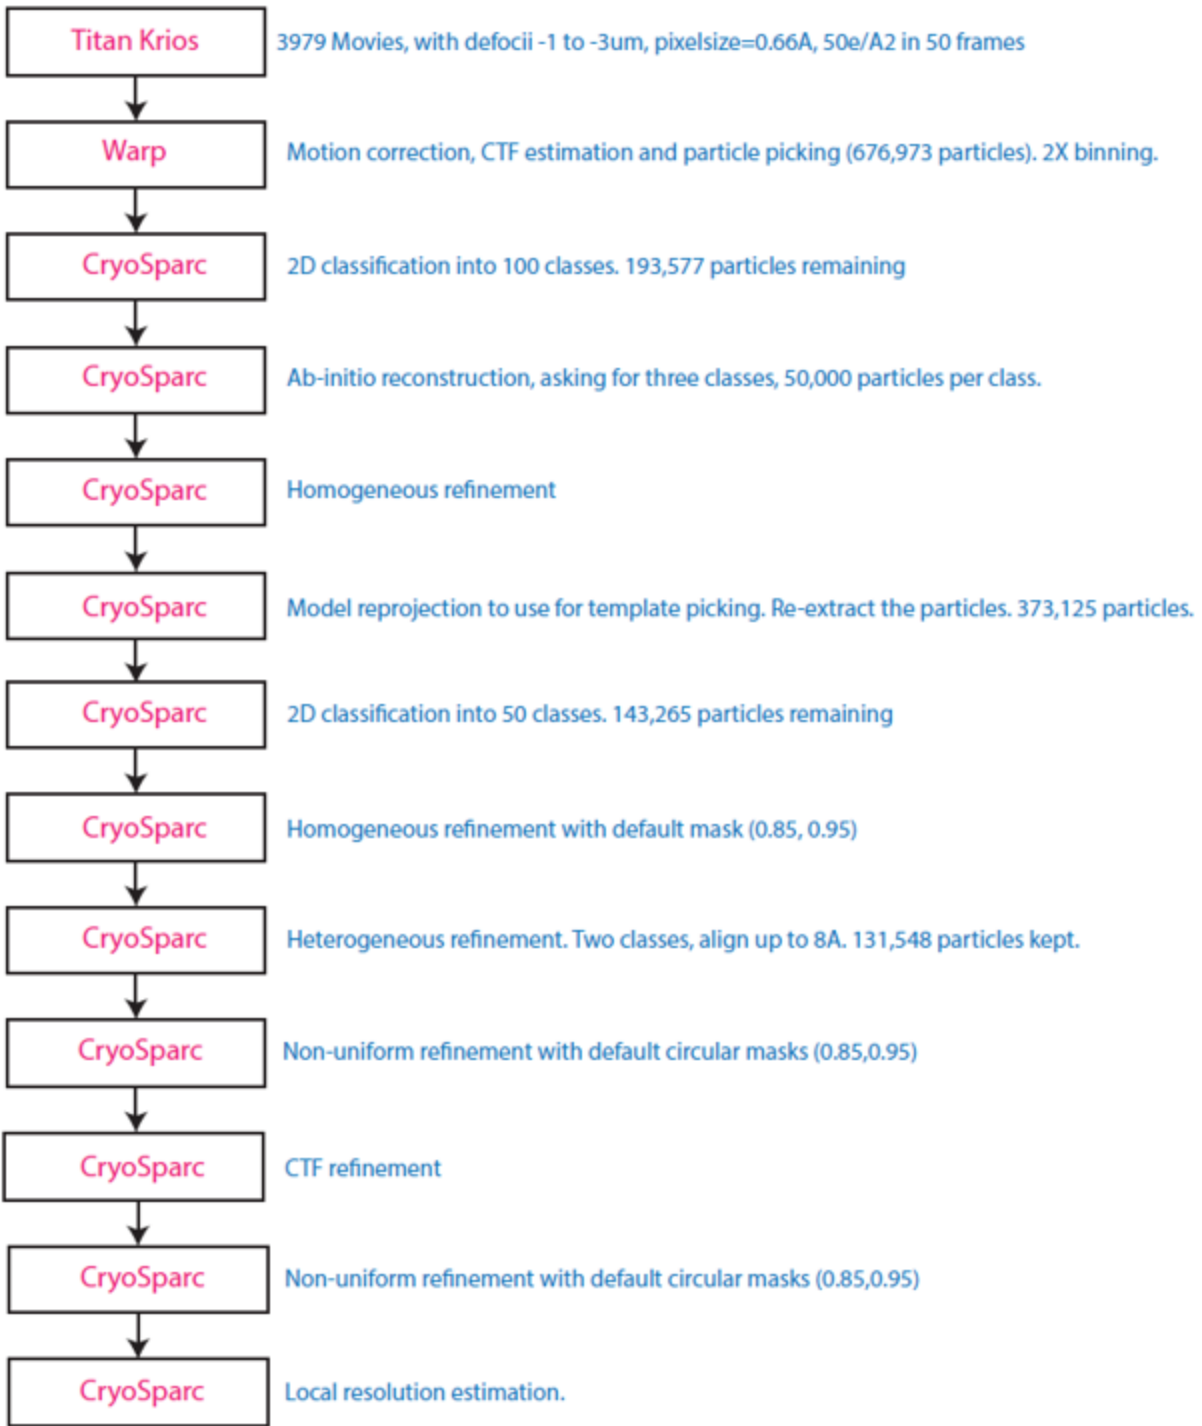

**Supplementary Figure 4: Cryo-EM Processing Flowchart for SARS-CoV-2 S complexed with Ab 12 Fab**

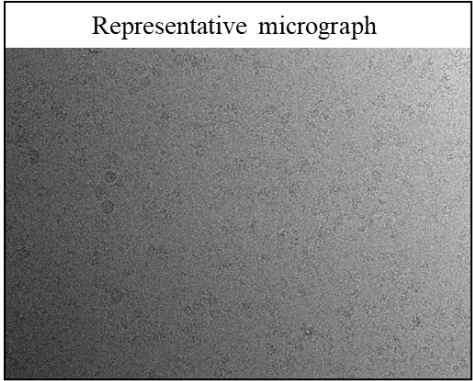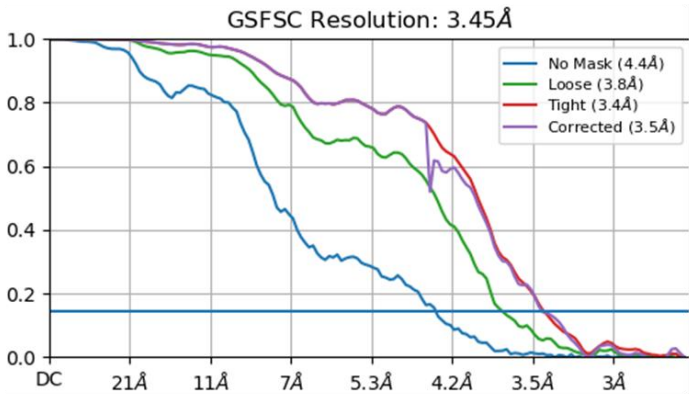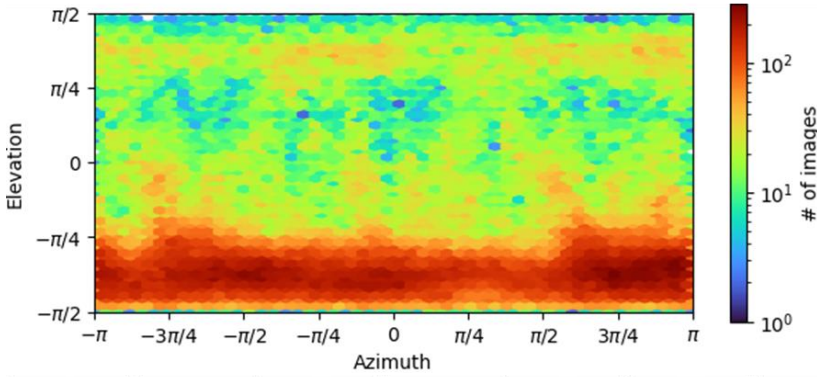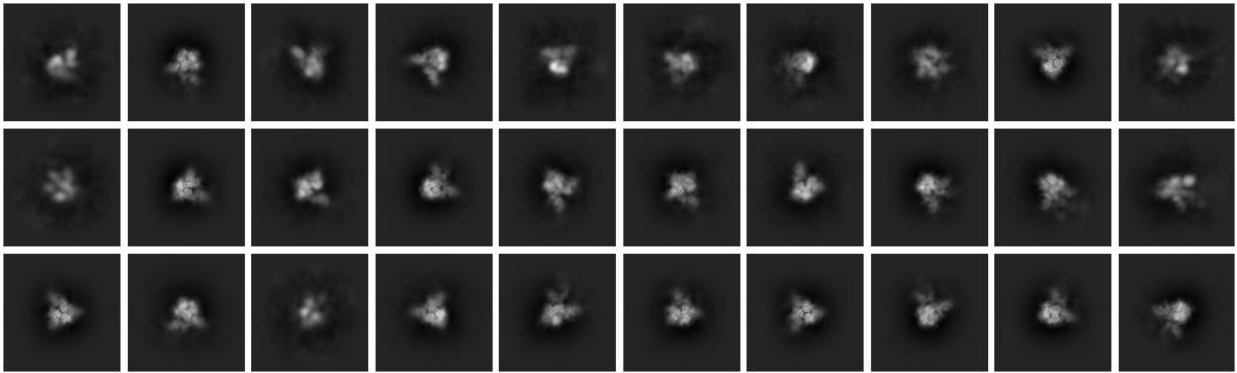



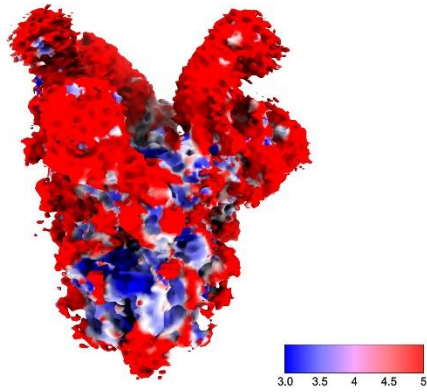

**Supplementary Figure 5: Cryo-EM Processing for SARS-CoV-2 S-D614G complexed with Ab 12 Fab**

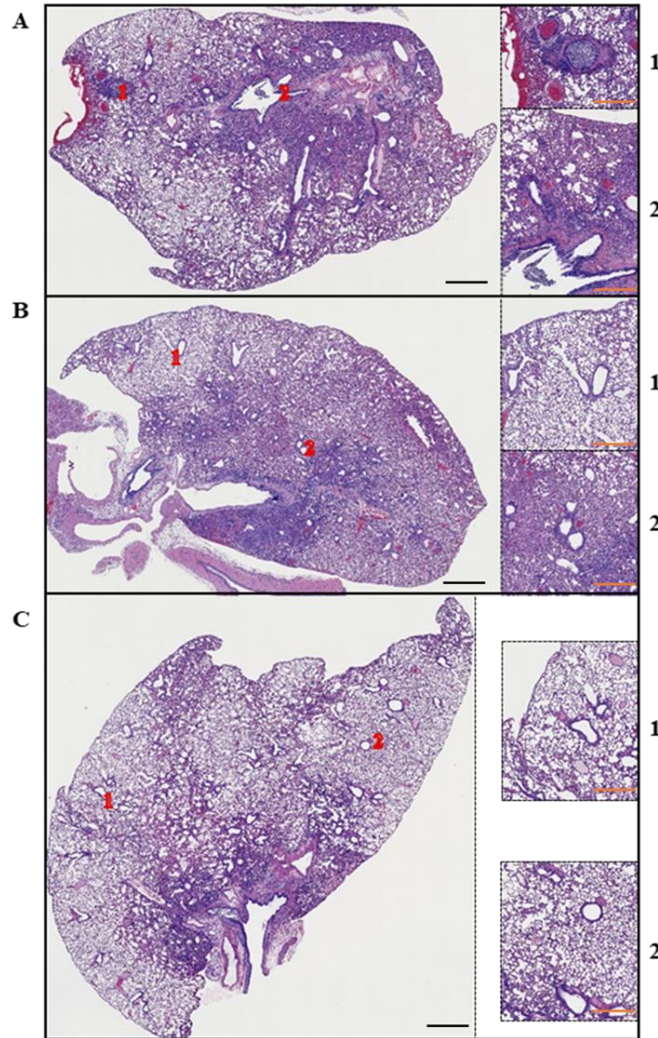

**Supplementary Figure 6: Pathological analysis from lungs of Syrian golden hamsters treated prophylactically with Ab 12 or Ab 2-7** **A)** Representative image of stained control lung. Extensive consolidation with multiple foci of inflammatory infiltration. Magnified images (locations on low magnification images marked with numbers): (1) Airways are obstructed by inflammatory cells (combination of MNC and PMNs). (2) Airway epithelial hyperplasia notable. Perivascular cuffing and congestion prominent. **B)** Representative image of stained Ab 2-7 lung. Extensive consolidation with multiple foci of inflammatory infiltration. (1) Pleuritis noted, but less severe. (2) Fewer inflammatory cells in airways, but hyperplasia of airway epithelia is still prominent. **C)** Representative image of stained Ab 12 lung. Consolidation markedly reduced, with fewer and smaller foci of inflammatory infiltration. Infiltrating inflammatory cells present in some airways. (1) Pleuritis is moderate relative to control. (2) Airway epithelial hypertrophy still present. Scale bars are 1 mm in the main (left) panels and 0.5 mm in the zoomed images (right). One slide was prepared for each animal (n=5) and a representative slide was chosen for each group.



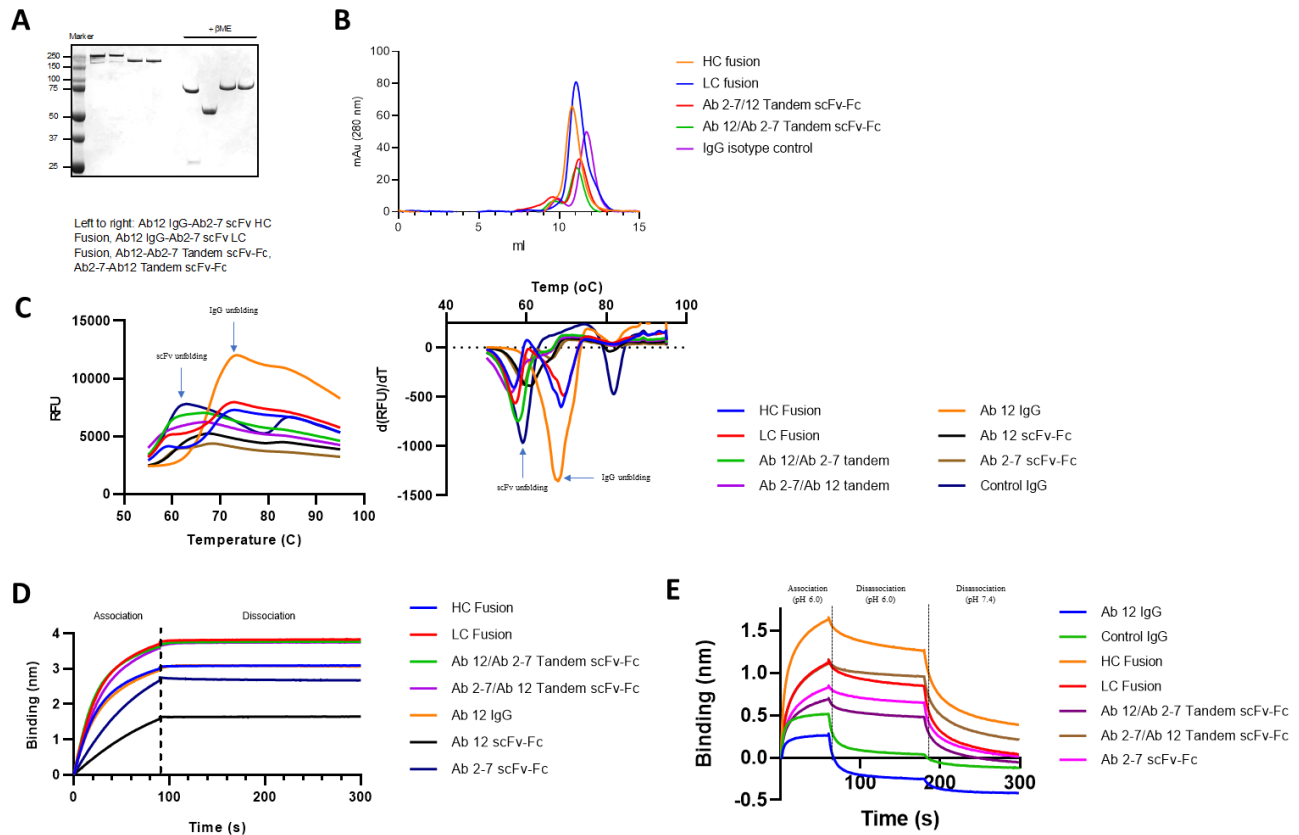

**Supplementary Figure 7: Biochemical characterization of bispecific antibodies.** **A)** SDS-PAGE gel of IgG fusions and tandem scFv-Fcs. The first four lanes are non-reduced samples and the last 4 lanes are reduced with 10% BME **B)** Size exclusion chromatography of the bispecific antibodies showing peaks at the expected elution volume and minimal aggregation **C)** Thermal stability of our mono and bispecific constructs measured by SYPRO Orange thermal shift assay. Graph on the left is the raw fluorescence vs temperature, graph on the right is the change of fluorescence vs temp. Melting peaks of composite antibodies is similar to that of the individual components, suggesting that the fusions do not significantly affect the stability of the parental IgG or scFv **D)** BLI curves for bispecific and monospecific Abs show strong binding the RBD. Ab 12 is the dominant binding moiety in these bispecifics and that is also shown in the binding curves here. **E)** Engineered BsAbs display similar kinetics to FcRn as parental antibodies, binding at pH 6 and disassociating at pH 7.4. Samples were tested with n=1 with the exception of (C) which was performed as 3 biologically independent samples with the mean values presented.

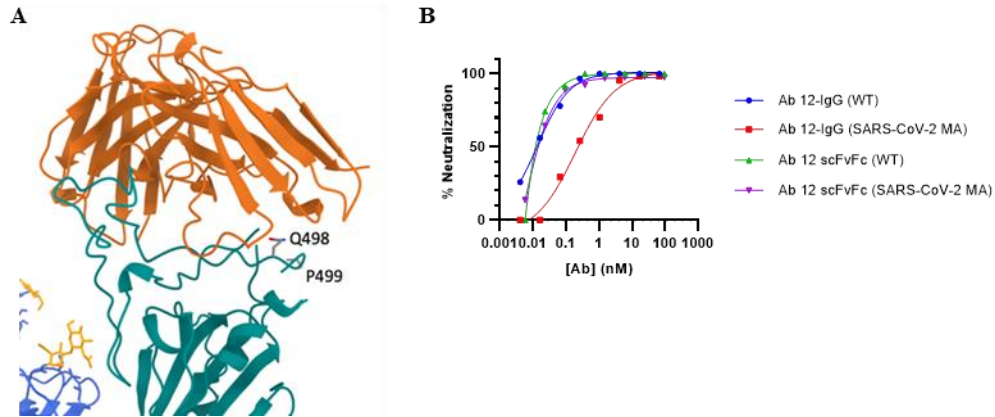

**Supplementary Figure 8: *In vitro* neutralization of a mouse adapted strain of SARS-CoV-2** **A)** Ribbon model showing Ab 12 (orange) bound to the RBD (teal), with the mutations in the mouse adapted virus labeled. **B)** Mutations in the mouse adapted strain do not affect Ab 12 scFv-Fc neutralization, however the IgG format exhibits a decrease in effectiveness. Mean values are presented with n=2 biologically independent samples. Source data are provided as a Source Data file.

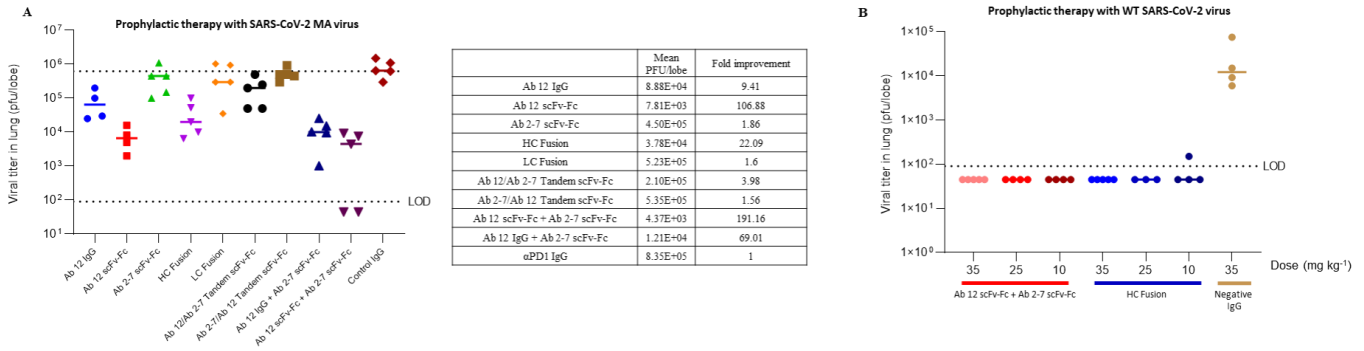

**Supplementary Figure 9. Prophylactic efficacy against SARS-CoV-2 virus in mouse models A)**

Prophylactic efficacy of Ab 12 and Ab 2-7 mono- and bi- specific antibodies were tested in aged Balb/c mice. Mean PFU after infection is tabulated in the table to the right of the chart, with fold improvement relative the  $\alpha$ PD1 negative control. **B)** BsAb-HC fusion and scFv-Fc mixture were selected for prophylactic testing in transgenic hACE2 mice with WT SARS-CoV-2 virus. Both treatments lead to reduction of viral titers below the limit of detection in all samples except for one animal treated with 10 mg kg<sup>-1</sup> of BsAb-HC that showed residual virus. Data from individual mice with mean values are presented on both plots. Source data are provided as a Source Data file.

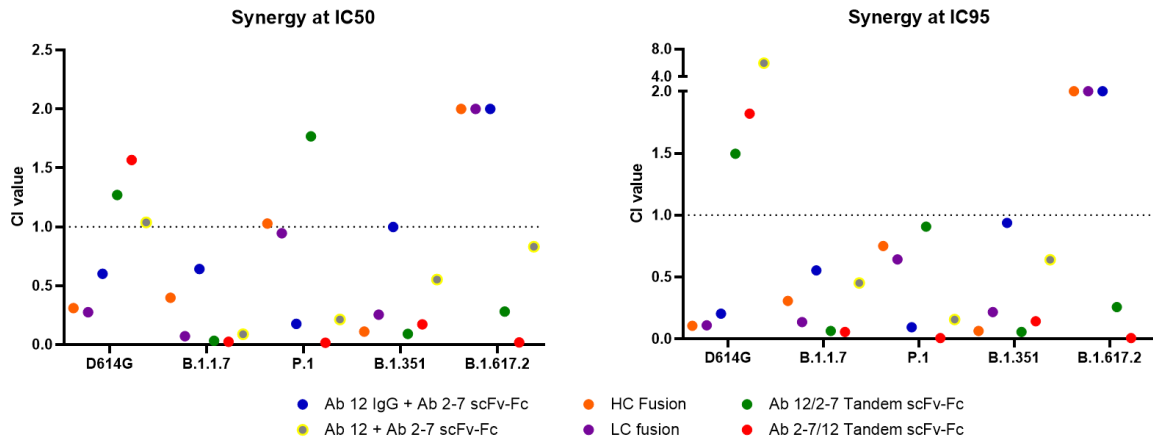

**Supplementary Figure 10. Combination Index (CI) values were calculated for the IC50 and IC95 values using in vitro neutralization curves and CompuSyn.** CI values are used to identify synergy by determining if the effect seen by a combination of two therapies is greater than the expected sum of their therapies.  $CI < 1$  indicates synergy,  $CI = 1$  indicates an additive effect, and  $CI > 1$  indicates an antagonistic effect where the result of the combination therapy is less than what would be expected when the two components are simply added together. Against the majority of variants tested, the BsAb therapies display potent synergy, though a few instances of additive and antagonistic effects are seen. Source data are provided as a Source Data file.

### EM data collection for Ab 2-7

---

|                                            |                                     |
|--------------------------------------------|-------------------------------------|
| Microscope                                 | FEI Titan Krios                     |
| Voltage (kV)                               | 300                                 |
| Detector                                   | Gatan K3                            |
| Calibrated magnification (Å/pix)           | 0.66                                |
| Exposure rate (e <sup>-</sup> /pix/sec)    | 8                                   |
| Frames per exposure                        | 80                                  |
| Exposure (e <sup>-</sup> /Å <sup>2</sup> ) | 80                                  |
| Defocus range (mm)                         | 1.5-2.5                             |
| Tilt angle (°)                             | 30                                  |
| Micrographs collected                      | 4,851                               |
| Micrographs used                           | 4,226                               |
| Particles extracted (total)                | 1,294,509                           |
| Automation software                        | SerialEM                            |
| Sample                                     | SARS-CoV-2 S D614G plus Ab 2-7 scFv |

### 3D reconstruction statistics

---

| EMDB IDs                             | EMD-25689                        | EMD-25690           | EMD-25711     |
|--------------------------------------|----------------------------------|---------------------|---------------|
| global:                              | EMD-25689                        | EMD-25690           | EMD-25711     |
| composite:                           | EMD-25663                        |                     |               |
| Complex Composition                  | Spike complexed with Ab 2-7 scFv | RBD:scFv subcomplex | Unbound Spike |
| Particles                            | 17,708                           | 53,124              | 41,384        |
| Symmetry                             | C3                               | C1                  | C1            |
| Map sharpening B-factor              | 118.5                            | 141.5               | 117.1         |
| Unmasked resolution at 0.5 FSC (Å)   | 8.1                              | 10.8                | 8.5           |
| Masked resolution at 0.5 FSC (Å)     | 3.4                              | 3.9                 | 3.5           |
| Unmasked resolution at 0.143 FSC (Å) | 3.9                              | 7.0                 | 4.0           |
| Masked resolution at 0.143 FSC (Å)   | 3.0                              | 3.4                 | 3.0           |



Local resolution range at 0.5 FSC (Å):

|                             |      |      |      |
|-----------------------------|------|------|------|
| minimum                     | 2.5  | 2.8  | 2.6  |
| 25 <sup>th</sup> percentile | 4.1  | 3.5  | 4.0  |
| Median                      | 6.0  | 4.8  | 6.1  |
| 75 <sup>th</sup> percentile | 6.9  | 6.0  | 7.2  |
| Maximum                     | 46.9 | 51.7 | 43.7 |

### Model refinement & validation statistics

| PDB IDs               | 7T3M                                                                                 | 7T67                                                                                    |
|-----------------------|--------------------------------------------------------------------------------------|-----------------------------------------------------------------------------------------|
| Refinement package    | Phenix                                                                               | Phenix                                                                                  |
| Refinement tool(s)    | Real-space refinement;<br>combine_focused_maps                                       | Real-space refinement                                                                   |
| Refinement strategies | min global;<br>local_grid_search;<br>adp; ss, rotamer and<br>Ramachandran restraints | min global;<br>local_grid_search;<br>adp; ss, rotamer and<br>Ramachandran<br>restraints |
| Composition           |                                                                                      |                                                                                         |
| Amino acids           | 3771                                                                                 | 3,075                                                                                   |
| RMSD bonds (Å)        | 0.002                                                                                | 0.003                                                                                   |
| RMSD angles (°)       | 0.56                                                                                 | 0.73                                                                                    |
| Average B-factors     |                                                                                      |                                                                                         |
| Amino acids           | 51.3                                                                                 | 134.76                                                                                  |
| Ramachandran          |                                                                                      |                                                                                         |
| Favored (%)           | 97.06                                                                                | 97.19                                                                                   |
| Allowed (%)           | 2.94                                                                                 | 2.81                                                                                    |
| Outliers (%)          | 0                                                                                    | 0                                                                                       |
| Rotamer outliers (%)  | 0.03                                                                                 | 0                                                                                       |
| C-beta outliers (%)   | 0                                                                                    | 0                                                                                       |
| CaBLAM outliers (%)   | 1.64                                                                                 | 2.69                                                                                    |
| CC (mask)             | 0.82                                                                                 | 0.80                                                                                    |

|                  |      |      |
|------------------|------|------|
| MolProbity score | 1.32 | 1.44 |
| Clash score      | 3.62 | 5.49 |
| EMRinger score   | 3.1  | 2.3  |

**Supplementary Table 1:** Cryo-EM of S-D614G complexed with Ab 2-7 scFv: Data collection, refinement statistics and model validation.

|                                           | Scores→                                                        | 0                            | 1                                  | 2                                                              | 3                                                               | 4                                                                   |
|-------------------------------------------|----------------------------------------------------------------|------------------------------|------------------------------------|----------------------------------------------------------------|-----------------------------------------------------------------|---------------------------------------------------------------------|
| <b>A</b>                                  | Extent of inflammation (% tissue involved)                     | 0                            | <10                                | 10-30                                                          | 30-60                                                           | >60                                                                 |
| <b>B</b>                                  | Inflammatory foci type                                         | No inflammation              | Patchy inflammatory foci, few (<2) | Patchy inflammatory foci, many (>2)                            | Large inflammatory foci, few (<2)                               | Large inflammatory foci, many (>2)                                  |
| <b>C</b>                                  | Inter-alveolar septa (IAS)                                     | Thin and delicate            | Thickened in <10% HPF              | Thickened in <30% HPF                                          | Thickened in <60% HPF                                           | Thickened in >60% HPF                                               |
| <b>D</b>                                  | Air ways                                                       | Clear; no cells              | Few cells in air way               | Moderate cells in air way                                      | More cells in air way; Epithelial hyperplasia                   | Occlusion of air way/epithelial hyperplasia or desquamation         |
| <b>E</b>                                  | Alveoli/ perivascular cuff/blood vessels/ pleuritis/cell types | Clear; no inflammatory cells | Few cells/ Few PMN or MNC          | Moderate cells/ PVC/ mild congestion/mild pleuritis/mostly MNC | More cells/PVC/ more congestion and pleuritis/ more MNC and PMN | Abundant cells/large PVC/severe congestion or pleuritis/mixed cells |
| *Adapted from Matute-Bello et al. (2011). |                                                                |                              |                                    |                                                                |                                                                 |                                                                     |

**Supplementary Table 2: Criteria for lung histopathology scoring**

HPF – high power field (>10x); PMN – polymorphonuclear cells/heterophils; MNC – mononuclear cells including lymphocytes and macrophages); PVC – Peri-vascular cuff.

| IC50 (nM)        | Ab 12 IgG | Ab 12 scFv-Fc | Ab 2-7 scFv-Fc | HC Fusion | LC Fusion | Ab 12/2-7 Tandem scFv-Fc | Ab 2-7/12 Tandem scFv-Fc | Ab 12 IgG+Ab2-7 scFv-Fc | Ab12 scFv-Fc +Ab 2-7 scFv-Fc | Control IgG |
|------------------|-----------|---------------|----------------|-----------|-----------|--------------------------|--------------------------|-------------------------|------------------------------|-------------|
| <b>D614G</b>     | 14.11     | 15.72         | N/A            | 2.221     | 5.082     | 3.516                    | 3.212                    | 9.327                   | 4.392                        | N/A         |
| <b>B.1.1.7</b>   | 4.325     | 1.65          | 1497           | 1.85      | 0.7511    | 0.6292                   | 0.6337                   | 3.472                   | 1.073                        | N/A         |
| <b>B.1.351</b>   | 178.4     | 3809          | 130.4          | 12.58     | 12.67     | 51.8                     | 6.837                    | 67.5                    | 91.57                        | N/A         |
| <b>P.1</b>       | 18.24     | <b>62.88</b>  | 6.702          | 2.896     | 2.781     | 8.069                    | 0.2712                   | 1.903                   | 1.023                        | N/A         |
| <b>B.1.617.2</b> | N/A       | N/A           | 102.1          | 132.2     | 439.1     | 158.6                    | 9.587                    | 133.6                   | 115.1                        | N/A         |

**Supplementary Table 3: IC50 for mono and BsAb neutralization of VOC.** IC50 values from *in vitro* variant neutralization in **Fig. 7** were calculated using a sigmoidal 4PL interpolation in GraphPad Prism. Abs that did not achieve at least 10% neutralization at the highest concentration or with IC50 values >10 fold greater than the highest tested concentration were changed to N/A.

### Supplementary References:

1. Brochet, X., Lefranc, M. P. & Giudicelli, V. IMGT/V-QUEST: the highly customized and integrated system for IG and TR standardized V-J and V-D-J sequence analysis. *Nucleic Acids Res.* **36**, 503–508 (2008).
2. Lefranc, M. P. *et al.* IMGT unique numbering for immunoglobulin and T cell receptor variable domains and Ig superfamily V-like domains. *Dev. Comp. Immunol.* **27**, 55–77 (2003).
3. Hodcroft, E. B. CoVariants: SARS-CoV-2 Mutations and Variants of Interest. <https://covariants.org/> (2021).
